# Supplementary material for: Creative challenge: Regular exercising moderates the association between task-related heart rate variability changes and individual differences in originality
Source: PLoS One. 2019 Jul 22;14(7):e0220205. doi: 10.1371/journal.pone.0220205 (PMC6645545; doi:10.1371/journal.pone.0220205)
Supplement: S1 Dataset — (XLSX) [file pone.0220205.s001.xlsx]

## Sheet: Tabelle1
sex	alter	met_sp	ffka_sp	S1_MeanHRbpm	S1_EDRHz	AUT_EDRHz_mean	idea_ges	RT_median	lnS1_RMSSD	lnAUT_S1_RMSSD	lnAUT_S2_RMSSD	lnAUT_S3_RMSSD	S1_RMSSDms	AUT_RMSSD_mean	AUT_S1_RMSSDms	AUT_S2_RMSSDms	AUT_S3_RMSSDms	delta_AUT_RMSSD	AUT_ori_R3	delta_RMSSD_AUT_res	Zmet_sp	METsp_X_rmssD
2	19	0	0	76.0635	0.180482	0.196559	10	11212	3.39873	3.04557	3.27667	3.13544	29.9259	23.5027	21.022	26.4874	22.9987	-6.42323	2.2381	-1.09631	-0.848466	0.93018
2	26	2.5	1	76.445	0.245688	0.252956	8	5616	3.60488	3.66523	3.67484	3.54933	36.7772	37.7659	39.0653	39.4423	34.79	0.988678	2.28889	0.142778	-0.752766	-0.107478
1	22	0	0	57.2522	0.21561	0.230064	8	10112	4.35569	3.90027	4.21857	4.29277	77.9207	63.5069	49.4157	67.9364	73.1685	-14.4139	2.46667	-0.438183	-0.848466	0.371783
1	24	20.5	3	54.9728	0.196605	0.218794	12	7639	4.23397	4.60084	4.32625	4.29911	68.9904	82.9539	99.5677	75.6598	73.6343	13.9635	2.28889	1.12028	-0.0637285	-0.0713935
1	28	19.25	4.25	67.0771	0.217539	0.185563	12	6648	3.11573	3.26016	3.22234	3.21168	22.5499	25.3203	26.0536	25.0867	24.8207	2.77045	2.08889	0.240473	-0.111578	-0.0268316
2	23	1.5	0.25	62.6468	0.228157	0.243323	14	4298	4.12728	4.3623	4.48408	4.40248	62.009	82.8953	78.4375	88.5956	81.6528	20.8863	2.3	1.5325	-0.791046	-1.21228
2	23	35	6	67.9342	0.193086	0.218665	13	4149	4.40685	3.84165	3.90742	4.01197	82.0105	50.5429	46.6025	49.7704	55.2558	-31.4676	2.13333	-1.51836	0.49133	-0.746013
2	29	0	0	70.9074	0.185166	0.291912	13	4615	3.5068	3.46748	3.44541	3.44143	33.3414	31.5479	32.0559	31.356	31.2317	-1.79347	2.33333	-0.2452	-0.848466	0.208044
1	26	128.5	5.5	82.6464	0.191125	0.260612	12	7647	3.29124	3.64208	3.58063	3.43092	26.8761	34.9908	38.171	35.8962	30.9051	8.11472	2.82222	0.937448	4.0705	3.81588
2	27	0	0	67.3968	0.276318	0.203	12	6914	3.54617	3.5438	3.32819	3.49021	34.6801	31.7595	34.598	27.8877	32.7929	-2.92058	2.35556	-0.374915	-0.848466	0.318103
2	22	3.5	0.5	78.0971	0.217275	0.230184	11	6482	3.77385	3.34313	3.45455	3.52989	43.5474	31.3573	28.3077	31.644	34.1204	-12.19	2.33333	-1.23568	-0.714487	0.882876
1	21	12.5	2.5	61.7695	0.252992	0.245839	11	5598	3.24421	3.29926	3.15855	3.29138	25.6414	25.8363	27.0926	23.5364	26.8798	0.194947	1.90476	-0.142387	-0.369968	0.0526784
2	21	6.5	1	76.7238	0.228762	0.223145	12	6689	3.64255	3.61314	3.62765	3.77327	38.1891	39.4096	37.0823	37.6243	43.5221	1.22053	2.77778	0.180238	-0.599647	-0.108079
1	20	31.5	4.8	61.36	0.268561	0.214092	12	7730	3.0203	3.09737	3.49501	3.54878	20.4975	29.9538	22.1397	32.9506	34.771	9.4563	3.28571	1.1979	0.35735	0.42807
2	24	10.86	1.67	67.3841	0.199053	0.271582	13	4025	2.74153	3.23773	3.32376	3.33968	15.5106	27.1502	25.4759	27.7646	28.2101	11.6396	2.55556	1.86226	-0.432747	-0.805885
2	22	2	0.5	57.2522	0.215614	0.212137	13	6414	4.35569	3.54121	3.20804	3.30066	77.9207	28.7898	34.5086	24.7305	27.1304	-49.1309	2.31111	-3.69639	-0.771906	2.85327
2	20	8	2	70.094	0.228334	0.251219	13	5081	3.92071	3.68679	4.17283	4.00762	50.4363	53.277	39.9166	64.8986	55.0157	2.84069	2.51111	0.364028	-0.542227	-0.197386
2	33	11	0.5	48.8666	0.237342	0.1931	13	4449	5.10295	4.93358	5.07772	4.93766	164.507	146.242	138.876	160.407	139.443	-18.2644	2.10256	0.394051	-0.427387	-0.168412
2	20	1.38	0.25	66.4622	0.218107	0.256613	14	3449	4.32024	4.04157	4.08549	4.1505	75.2064	59.9509	56.9157	59.4711	63.466	-15.2555	2.28889	-0.496499	-0.79564	0.395035
2	20	38.5	7	69.6885	0.213442	0.257188	11	7414	3.53344	3.3139	3.47393	3.47818	34.2415	30.7188	27.4921	32.2633	32.4008	-3.52277	2.48889	-0.462158	0.625309	-0.288992
2	21	5.83	2.33	109.201	0.274541	0.270016	12	4450	2.11922	1.81099	1.63581	1.8059	8.32461	5.77852	6.1165	5.13364	6.08542	-2.54609	2.88095	-2.32865	-0.625294	1.45609
2	21	19	4	69.42	0.245502	0.250658	11	6856	3.76743	3.8281	3.79734	3.63274	43.2689	42.7912	45.9749	44.5824	37.8163	-0.477679	2.4359	0.0710842	-0.121148	-0.00861173
2	22	35	8	91.7801	0.26234	0.286005	13	5365	3.10219	3.48728	3.53488	3.45532	22.2466	32.8854	32.6968	34.291	31.6683	10.6388	2.48889	1.36947	0.49133	0.672863
2	28	0	0	76.8382	0.299547	0.268363	13	5441	3.52825	3.25128	3.52103	3.47107	34.0643	30.6045	25.8233	33.8191	32.1712	-3.45976	2.26667	-0.474861	-0.848466	0.402904
2	27	15	3	63.5601	0.245959	0.237758	14	3073	3.32349	3.31134	3.36927	3.45111	27.7571	29.3381	27.4218	29.0574	31.5352	1.58104	2.46667	0.10224	-0.274268	-0.0280413
2	21	14	2	51.6921	0.217992	0.199702	8	10996	4.46645	4.33832	4.46641	4.4408	87.047	82.8218	76.5787	87.0437	84.8431	-4.2252	2.64286	0.316816	-0.312548	-0.09902
2	19	0	0	80.8772	0.243961	0.25347	14	4207	3.5046	3.03073	2.99693	3.13156	33.2682	21.2154	20.7125	20.024	22.9098	-12.0528	2.35556	-1.88611	-0.848466	1.6003
2	26	31	4	61.4401	0.246499	0.20394	12	6798	3.90371	4.13284	4.35163	4.27426	49.5859	70.5954	62.3548	77.6046	71.8266	21.0094	2.52381	1.65464	0.33821	0.559615
1	21	13.5	3	57.4269	0.196725	0.219778	10	9889	4.83097	4.4724	4.65615	4.6974	125.332	100.819	87.5665	105.23	109.662	-24.5124	2.61538	-0.184049	-0.331688	0.0610469
2	33	10.88	2.25	75.2959	0.23218	0.237449	14	3424	3.86352	3.88606	3.92479	3.81791	47.6325	48.2899	48.7184	50.6422	45.5092	0.657399	2.55556	0.239249	-0.431981	-0.103351
1	28	24	4.5	63.6456	0.250628	0.21098	11	5532	3.76931	4.04575	4.07723	4.03952	43.3503	57.6449	57.1539	58.982	56.7988	14.2946	1.88889	1.31197	0.0702511	0.0921672
1	23	17.5	2.5	77.7264	0.145427	0.191216	12	5207	3.17514	3.1889	3.19044	3.06248	23.9301	23.3138	24.2618	24.2991	21.3806	-0.616258	2.31111	-0.31979	-0.178568	0.0571044
2	31	0	0	77.7264	0.145427	0.191216	12	5207	3.17514	3.1889	3.19044	3.06248	23.9301	23.3138	24.2618	24.2991	21.3806	-0.616258	2.48718	-0.31979	-0.848466	0.271331
1	24	32.5	3.75	64.6568	0.257119	0.219406	9	8280	3.57355	3.23169	3.19578	3.14291	35.6428	24.3076	25.3225	24.4292	23.1711	-11.3352	2.42222	-1.56508	0.39563	-0.619191
1	20	0	0	57.677	0.208606	0.239529	10	8614	3.4882	3.69184	3.58361	3.81682	32.727	40.527	40.1185	36.0031	45.4594	7.79996	2.2619	0.839266	-0.848466	-0.712089
2	20	5	2	78.5498	0.249105	0.19978	13	4416	3.68784	3.40738	3.34888	3.45045	39.9585	30.0573	30.1862	28.4709	31.5147	-9.90124	2.16667	-1.0953	-0.657067	0.719682
1	22	47	8	68.7502	0.22123	0.224843	13	4423	4.31879	4.45019	4.41793	4.40933	75.0979	83.5941	85.6431	82.9246	82.2145	8.49613	2.5	0.888096	0.950689	0.844303
2	22	22.75	5.125	66.5155	0.197119	0.212599	12	7389	3.69547	3.70524	3.63849	3.66471	40.2646	39.2464	40.6599	38.0343	39.045	-1.01822	2.02222	-0.016488	0.0224012	-0.000369352
2	21	12.5	2.5	69.5065	0.234654	0.238738	13	4182	3.8945	3.74164	3.92023	3.72483	49.1316	44.6811	42.167	50.4121	41.4642	-4.45056	2.37778	-0.205343	-0.369968	0.0759701
2	22	41.25	7	58.7458	0.18866	0.232334	13	12329	4.31394	4.03249	3.94264	4.07441	74.7341	55.5905	56.4009	51.5545	58.816	-19.1436	2.46667	-0.78859	0.730579	-0.576127
2	19	115	22	70.6806	0.226499	0.136895	11	5098	3.81197	3.50241	3.65307	3.55681	45.2392	35.6132	33.1955	38.5928	35.0513	-9.62606	1.8	-0.841028	3.55372	-2.98878
2	26	12.5	5	68.407	0.259725	0.239142	14	3281	3.94537	3.61837	4.023	3.81666	51.6954	46.1992	37.2768	55.8685	45.4521	-5.49619	2.22222	-0.288555	-0.369968	0.106756
2	20	18	3	72.046	0.223188	0.197007	14	2933	3.82842	3.89533	4.01854	3.96024	45.99	52.4208	49.1723	55.6201	52.47	6.43087	2.66667	0.703059	-0.159428	-0.112087
1	21	62.5	10.5	64.7667	0.186905	0.236822	11	6732	3.45403	3.56009	3.43126	3.58713	31.6277	34.0707	35.1663	30.9155	36.1303	2.44307	2.59524	0.252464	1.54403	0.389811
2	20	0	0	66.647	0.255829	0.229871	10	9114	4.34941	4.56287	4.53995	4.32086	77.4328	88.2661	95.8584	93.6863	75.2537	10.8333	2.28571	0.980515	-0.848466	-0.831934
1	25	90	3.75	73.9077	0.126367	0.195513	10	7573	3.68962	3.35406	3.33729	3.10482	40.0298	26.3555	28.6186	28.1428	22.3052	-13.6743	2.2	-1.66806	2.59672	-4.3315
2	21	0	0	65.4047	0.248208	0.259607	7	9830	3.56466	3.45211	3.54619	3.61741	35.3274	34.4963	31.567	34.6809	37.2409	-0.831108	2.68889	-0.0911952	-0.848466	0.077376
2	25	0	0	66.0957	0.183322	0.199461	11	6632	3.91996	4.21666	3.99848	4.24261	50.3986	63.9702	67.8064	54.5152	69.589	13.5716	1.73333	1.18136	-0.848466	-1.00234
2	21	15	2.5	66.9559	0.235855	0.260251	13	6998	4.43275	4.76546	4.64236	4.521	84.1627	104.367	117.385	103.789	91.9272	20.2044	2.13333	1.3798	-0.274268	-0.378435
2	18	20.5	3.5	73.1132	0.246776	0.253424	13	4715	3.91653	3.65101	3.90991	3.73459	50.2259	43.4263	38.5137	49.8944	41.8709	-6.79961	2.2	-0.4098	-0.0637285	0.0261159
1	22	49	8	56.9375	0.216249	0.209727	12	6407	3.65759	4.06924	3.95875	4.01677	38.7678	55.4752	58.5123	52.3919	55.5216	16.7074	2.51111	1.54848	1.02725	1.59067
1	23	47	5.25	59.7355	0.200655	0.206719	10	9580	3.8633	3.76436	3.87882	3.72092	47.6223	44.2684	43.136	48.3671	41.3022	-3.35392	2.54762	-0.125116	0.950689	-0.118947
2	19	1.25	0.25	73.4176	0.268872	0.233255	13	4623	4.08636	3.86985	3.9244	3.71792	59.5226	46.5788	47.9351	50.6225	41.1788	-12.9438	2.8	-0.717308	-0.800616	0.574289
2	22	17.75	6.5	67.5982	0.247307	0.248663	12	7089	4.66087	4.34291	4.46036	4.49862	105.729	84.4476	76.9314	86.5184	89.893	-21.2809	2.28889	-0.299685	-0.168998	0.0506462
2	24	2	0.5	69.7966	0.234749	0.25371	13	5540	3.6139	3.59542	3.62813	3.5737	37.1106	36.5739	36.4311	37.6424	35.6483	-0.536717	2.53333	-0.0165804	-0.771906	0.0127985
1	22	82.5	12.25	51.2333	0.177136	0.195947	6	5748	4.1233	4.08481	4.1717	3.99837	61.7624	59.5885	59.4305	64.8257	54.5093	-2.17392	2.13333	0.175437	2.30962	0.405195
1	26	0	0	75.3083	0.240857	0.263518	13	5965	3.78231	3.4878	3.63807	3.48202	43.9174	34.4191	32.7138	38.0184	32.5252	-9.49821	2.57778	-0.879176	-0.848466	0.745951
2	19	56	4	65.8943	0.247413	0.2953	13	5781	4.39565	4.19721	4.0054	3.98771	81.0977	58.4418	66.5005	54.8936	53.9315	-22.6559	1.95556	-0.886167	1.29521	-1.14777
2	18	18.5	2	58.0483	0.238098	0.272162	12	5764	4.19128	4.06816	4.12415	4.06275	66.1072	59.4663	58.4493	61.8152	58.1342	-6.64089	2.5	-0.0670574	-0.140288	0.00940737
1	25	73.5	11	65.7306	0.235368	0.199724	10	8798	3.90896	3.89108	3.8949	3.86792	49.8471	48.6526	48.9637	49.1512	47.843	-1.19452	2.06667	0.111669	1.96511	0.219441
2	23	0	0	76.4145	0.2481	0.245904	12	6539	3.96127	3.77427	3.83152	3.80146	52.5239	44.8215	43.5655	46.1327	44.7664	-7.70232	2.48889	-0.415396	-0.848466	0.352449
1	23	10.5	1.5	67.326	0.236302	0.207023	10	8830	4.11333	4.17446	4.16443	4.08115	61.1502	62.8582	65.0049	64.3562	59.2136	1.70806	2.46667	0.438874	-0.446527	-0.195969
2	19	25.5	3.75	62.6076	0.269962	0.227029	6	11030	4.17034	4.12656	4.05302	4.05426	64.7372	59.0594	61.9646	57.5713	57.6424	-5.67777	1.97619	-0.0215555	0.127671	-0.00275201
2	19	38	6	62.8936	0.215163	0.247705	10	5814	4.05871	3.75892	3.95658	3.92363	57.8995	48.588	42.9019	52.2784	50.5836	-9.3115	2.26667	-0.443431	0.60617	-0.268794
1	32	45	10	70.5233	0.218262	0.179397	14	3125	3.31705	3.53995	3.27754	3.48443	27.5788	31.1931	34.4651	26.5105	32.6037	3.61433	2.53333	0.360058	0.874129	0.314737
2	33	6	1.5	62.7266	0.224445	0.204073	12	6114	3.64034	3.94279	3.9217	3.86397	38.1049	49.9009	51.5624	50.4861	47.6543	11.796	2.77778	1.17371	-0.618787	-0.726275
2	27	48.12	5.92	73.5507	0.293528	0.216922	13	5673	3.48118	3.56029	3.6438	3.60163	32.4981	36.6894	35.1733	38.2367	36.6581	4.1913	2.28205	0.46902	0.993562	0.466
2	25	12.75	3.5	67.0242	0.285957	0.260293	13	4815	3.64486	3.74339	3.78962	3.85397	38.2774	44.5536	42.2411	44.2395	47.1801	6.27611	2.08889	0.686468	-0.360398	-0.247401
1	24	28.75	11.5	86.6885	0.266687	0.221421	9	11121	3.2364	3.00693	3.37064	3.37548	25.4419	26.1869	20.2252	29.0972	29.2383	0.745011	3	-0.109171	0.252081	-0.0275198
2	20	21.5	2.75	65.9772	0.206398	0.251693	11	6780	4.81419	4.40673	4.24943	4.27014	123.247	74.5329	82.0012	70.0658	71.5317	-48.7143	2.41111	-1.3653	-0.0254486	0.034745
1	25	62	9	61.2811	0.21992	0.236865	13	3457	3.97645	3.71956	3.86123	3.85392	53.3273	45.3158	41.2461	47.5235	47.1777	-8.01154	2.11111	-0.431724	1.52489	-0.658331
2	20	7	1	100.315	0.268456	0.25034	13	3891	3.28824	2.59992	3.05554	2.93047	26.7956	17.8106	13.4627	21.2327	18.7365	-8.98499	2.82222	-1.90444	-0.580507	1.10554
1	22	0	0	79.4685	0.305737	0.303915	12	7330	3.04633	3.18671	3.22128	3.35912	21.038	26.0109	24.2086	25.0602	28.764	4.97288	2.33333	0.588906	-0.848466	-0.499667
2	21	0	0	79.8891	0.13185	0.224647	12	8332	3.38393	3.39237	3.62148	3.59085	29.4864	34.4647	29.7364	37.3927	36.265	4.97826	2.24444	0.538955	-0.848466	-0.457285
1	28	12	2	57.7914	0.157596	0.155308	13	4540	3.67314	4.1039	4.03397	3.77495	39.3755	53.552	60.5763	56.4846	43.5952	14.1765	2	1.31092	-0.389108	-0.510088
1	22	63.5	8	60.1921	0.142528	0.186802	12	8089	3.52153	3.37355	3.49265	3.52072	33.8362	31.9546	29.1821	32.873	33.8088	-1.88157	2.15556	-0.252826	1.58231	-0.400048
2	23	12.5	3.25	68.6603	0.163694	0.164002	14	3889	4.17769	3.82355	3.77871	3.77855	65.2151	44.4261	45.7663	43.7594	43.7526	-20.789	2.42222	-1.22467	-0.369968	0.45309
2	24	0	0	110.331	0.338725	0.285526	13	4732	3.003	2.65298	2.68053	2.70119	20.1459	14.5621	14.1963	14.5928	14.8974	-5.58377	2.42222	-1.64642	-0.848466	1.39693
1	20	0	0	64.3629	0.289431	0.258903	13	5147	4.57177	4.61978	4.71603	4.62728	96.7152	105.143	101.472	111.723	102.235	8.42827	2.46667	0.930666	-0.848466	-0.789639
1	22	10.5	1.5	63.8816	0.280655	0.245855	13	6680	3.87811	3.96636	4.00474	3.95699	48.3325	53.3164	52.7921	54.8574	52.2999	4.9839	2.15556	0.600118	-0.446527	-0.267969
1	24	1.32	0.33	66.1886	0.313093	0.184978	8	12080	3.14276	3.59418	3.61156	3.60066	23.1678	36.6774	36.386	37.0239	36.6223	13.5097	2.09524	1.67839	-0.797937	-1.33925
1	24	12	2	81.5407	0.230732	0.236666	10	9047	3.80589	3.8361	3.7717	3.70659	44.9651	43.5044	46.3444	43.4539	40.7149	-1.46068	1.95556	0.0113399	-0.389108	-0.00441244
1	21	48	6	57.9752	0.216567	0.18842	12	6973	4.28415	4.63507	4.59597	4.60375	72.541	100.659	103.035	99.084	99.8585	28.1183	2.26667	1.7807	0.988968	1.76106
1	24	9	2.5	72.1502	0.26764	0.145391	12	6665	4.05418	3.77154	3.80239	4.04682	57.6378	48.4902	43.447	44.8082	57.2154	-9.14755	1.8	-0.452598	-0.503947	0.228086
2	19	31	7	92.2983	0.299411	0.271717	12	8656	3.54805	3.41752	3.30091	3.33865	34.7456	28.604	30.4936	27.1372	28.1811	-6.14167	2.15556	-0.802598	0.33821	-0.271447
2	30	42	6	49.1965	0.172158	0.168589	13	5614	4.15811	4.32364	4.21448	4.1737	63.9504	69.359	75.4627	67.659	64.9555	5.40869	2.54762	0.681525	0.759289	0.517474
1	18	33.35	6.05	71.5356	0.202808	0.224298	12	7548	3.48765	3.61159	3.43567	3.61257	32.7092	35.0461	37.0247	31.0522	37.0613	2.33694	2.13333	0.244635	0.428168	0.104745
1	25	0	0	61.0515	0.185983	0.212756	11	9596	4.10166	3.81212	3.91156	3.89902	60.4405	48.1923	45.2463	49.9767	49.3539	-12.2482	2.57143	-0.619469	-0.848466	0.525599
1	21	0	0	70.8864	0.24823	0.210388	13	4498	3.63303	3.85177	3.78276	3.72566	37.8274	44.1707	47.0764	43.9369	41.4987	6.34324	2.82222	0.691731	-0.848466	-0.586911
1	26	0	0	65.1236	0.129331	0.170426	14	3515	3.51261	3.36843	3.43586	3.46916	33.5356	30.7335	29.0328	31.0581	32.1097	-2.80206	2.17778	-0.377523	-0.848466	0.320315
1	20	84.5	10	49.0933	0.12809	0.166797	12	8506	4.50315	4.22034	3.79826	4.28492	90.3016	61.7592	68.0569	44.6236	72.597	-28.5424	1.95556	-1.11384	2.38618	-2.65783
1	23	0.996	0.166	60.4402	0.226857	0.206844	12	5250	4.48595	4.45421	4.3997	4.49661	88.7612	85.7091	85.9882	81.4267	89.7123	-3.05209	2.57143	0.392025	-0.810339	-0.317674
1	20	47.5	5.5	61.0664	0.183234	0.248703	11	7214	4.78226	4.64792	4.5941	4.70878	119.373	104.728	104.368	98.8994	110.917	-14.6455	2.64444	0.162125	0.969828	0.157234
1	24	46	2.5	50.6218	0.185224	0.216772	13	4648	4.60695	4.29771	4.35079	4.69547	100.178	86.8407	73.5314	77.5398	109.451	-13.3377	2.28571	-0.0490751	0.912409	-0.0447766
1	24	22.5	5	61.5571	0.231252	0.258162	10	6414	3.80837	3.9594	4.41077	4.36951	45.0768	71.2547	52.4259	82.3332	79.0049	26.1779	2.26667	1.96881	0.0128313	0.0252623
1	25	7.5	1.5	69.2704	0.169448	0.160928	12	8805	4.41128	4.57604	4.41978	4.47313	82.3751	89.2792	97.1285	83.0783	87.6309	6.90412	2.55556	0.822027	-0.561367	-0.461459
1	20	0	0	79.1218	0.240847	0.201827	9	11230	3.13929	3.04679	3.23857	3.13699	23.0876	23.1931	21.0476	25.4972	23.0344	0.105507	2.6	-0.21868	-0.848466	0.185543
